# Supplementary material for: Conductive hydrogel-based flexible strain sensors with superior chemical stability and stretchability for mechanical sensing in corrosive solvents
Source: Royal Society of Chemistry journal article supplement (doi:10.1039/d0nj05880g), 2021-01-01
Supplement: d0nj05880g1.pdf [file d0nj05880g1.pdf]

**Electronic Supplementary Information (ESI) For**  
**Conductive Hydrogel-Based Flexible Strain Sensor with Superior**  
**Chemical Stability and Stretchability for Mechanical Sensing in**  
**Corrosive Solvents**

Hong Zhang<sup>a</sup>, Mingqiang Yue<sup>a</sup>, Tingting Wang<sup>a, b, c</sup>, Jinqing Wang<sup>b, c\*</sup>, Xianzhang Wu<sup>b, c</sup>, and Shengrong Yang<sup>b, c\*</sup>

<sup>a</sup> College of Chemical Engineering, Northwest Minzu University, Key Laboratory for Utility of Environmental-Friendly Composite Materials and Biomass in University of Gansu Province, Lanzhou 730030, China.

<sup>b</sup> State Key Laboratory of Solid Lubrication, Lanzhou Institute of Chemical Physics, Chinese Academy of Sciences, Lanzhou 730000, China.

<sup>c</sup> Center of Materials Science and Optoelectronics Engineering, University of Chinese Academy of Sciences, Beijing 100049, China.

\* Corresponding authors,

[jqwang@licp.cas.cn](mailto:jqwang@licp.cas.cn) (*J. Q. Wang*); [sryang@licp.cas.cn](mailto:sryang@licp.cas.cn) (*S. R. Yang*)

*Fax: 0086-931-4968019*

*Tel: 0086-931-4968076*

## Preparation of GO

First, 4.2 g potassium persulfate ( $K_2S_2O_8$ ), 4.2 g  $P_2O_5$ , 5 g graphite powder were added into 20 mL  $H_2SO_4$  in batches, and the mixed solution was stirred at 80 °C for 5h. After cooling to room temperature, 0.25 L of ultrapure water was slowly added to the mixed solution and allowed to stand overnight. The precipitate was washed several times and suction filtered to remove excess acid and dried at 60 °C. For oxidization, the pretreated graphite powder (5 g) was slowly added to concentrated  $H_2SO_4$  (250 mL) in an ice-water bath state and thoroughly stirred. 30 g of  $KMnO_4$  was slowly added under stirring; then the temperature was raised to 35 °C and stirred for 2 h. Then, 400 mL of ultrapure water was slowly added dropwise for dilution and stirred for 2 h. The mixture was further diluted with ultrapure water (1.2 L), and  $H_2O_2$  (30 mL, 30%) was added dropwise until the solution turned bright yellow; stirring was continued, and the solution was allowed to stand overnight to precipitate. The precipitate was washed neutral with hydrochloric acid and washed several times with deionized water until it could not be centrifuged. The precipitate was washed with hydrochloric acid to neutrality and washed several times with deionized water until it could not be centrifuged; and the resulting product was dialyzed against ultrapure water for two weeks. Finally, the GO suspension was obtained by the treatment of ultrasonication.

Table S1 Composition formulations of hydrogels

| NIPA<br>M<br>(g) | PEDOT:PSS<br>(PH1000)<br>(13 mg/mL)<br>(mL) ( $V_P/V_H$ %) | GO<br>(5 mg/mL)<br>(mL) | H <sub>2</sub> O<br>(mL) | BIS<br>(mg) | KPS<br>(g) | TEMED<br>( $\mu$ L) |
|------------------|------------------------------------------------------------|-------------------------|--------------------------|-------------|------------|---------------------|
| 8.475            | 0.00 (0.0 %)                                               | 20                      | 30                       | 1.155       | 0.135      | 100                 |
| 8.475            | 0.05 (1.7 %)                                               | 20                      | 23                       | 1.155       | 0.135      | 100                 |
| 8.475            | 0.15 (5.1 %)                                               | 20                      | 23                       | 1.155       | 0.135      | 100                 |
| 8.475            | 0.50 (8.5 %)                                               | 20                      | 25                       | 1.155       | 0.135      | 100                 |
| 8.475            | 0.70 (11.9 %)                                              | 20                      | 23                       | 1.155       | 0.135      | 100                 |

Note:  $V_P$ : volume of PEDOT:PSS solution;  $V_H$ : volume of prepared hydrogel.  $V_P/V_H$  is the volume ratio of the PEDOT:PSS to the prepared hydrogel.

### Characterizations

The conductivity of the hydrogel was tested using a Keithley 2450 digital source meter (2450, Tektronix, USA). A field emission scanning electron microscope (SEM, JSM-6701F, Japan Electronics Co., Ltd.) is used to observe the internal network structure of the hydrogel, and a thin layer of gold is sprayed on the surface to obtain a clearer picture. Fourier transform infrared spectroscopy (FTIR, IFS 66 v/s, Germany), Raman spectroscopy (Raman, LabRAM HR Evolution, France), X-ray powder diffraction (XRD, EMPYREAN, Netherlands) characterizations were performed for the structure and composition analysis of hydrogels.

### Conductivity Test

A Keithley 2450 digital source meter was used to test the resistance of the hydrogel cylinders with a height of 20 mm and a diameter of 6 mm. The water content of all hydrogels used for the test was 78%. The conductivity of hydrogel was calculated using the following formula:

$$\sigma = \frac{L}{S} \frac{1}{R}$$

where  $\sigma$ ,  $L$ ,  $S$ , and  $R$  represent the conductivity, length, cross-sectional area, and resistance of the hydrogel, respectively. All tests were repeated three times at room temperature, and G(8.5%)PP-h was selected as the test sample. The measured conductivity was 0.084 S/m.

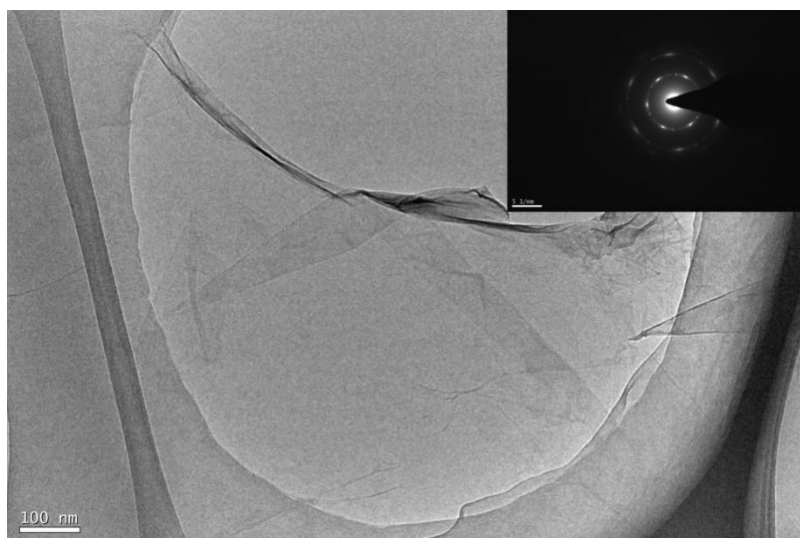

**Figure S1.** TEM image of GO nanosheet.

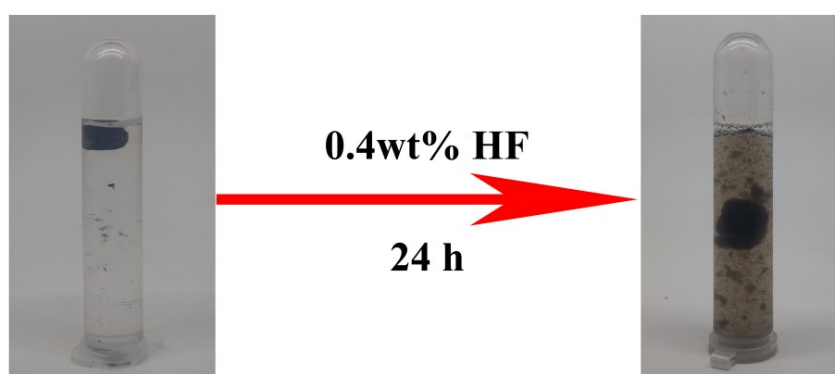

**Figure S2.** GO/PEDOT:PSS/PNIPAM hydrogel without chemical crosslinker of BIS is easily damaged in 0.4 wt% HF solution at the temperature of 25 °C.

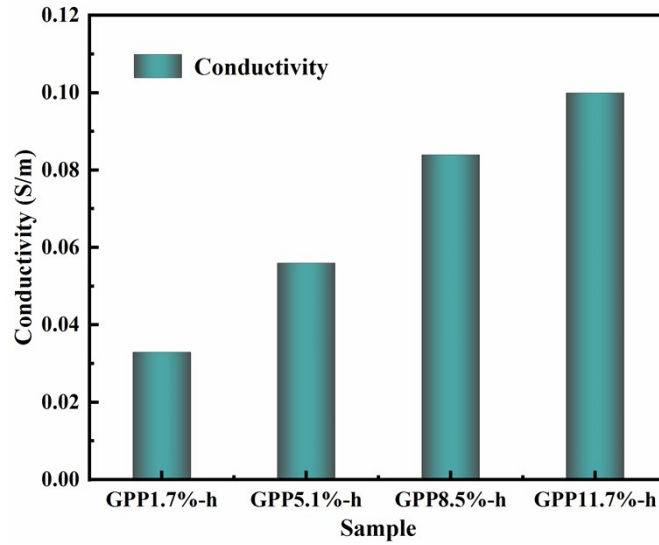

**Figure S3.** The content influence of PEDOT:PSS on the conductivity of hydrogels.

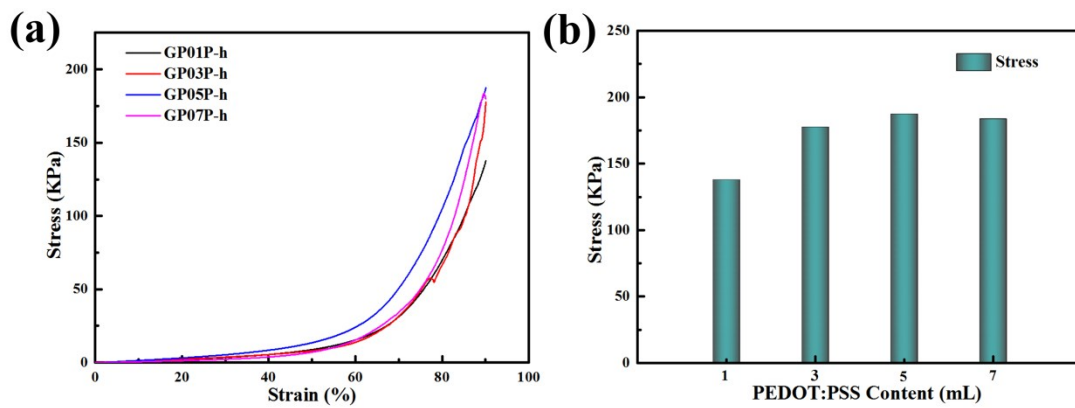

**Figure S4.** Compressive stress-strain curves and column line charts of the GPP-h with different contents of PEDOT:PSS.

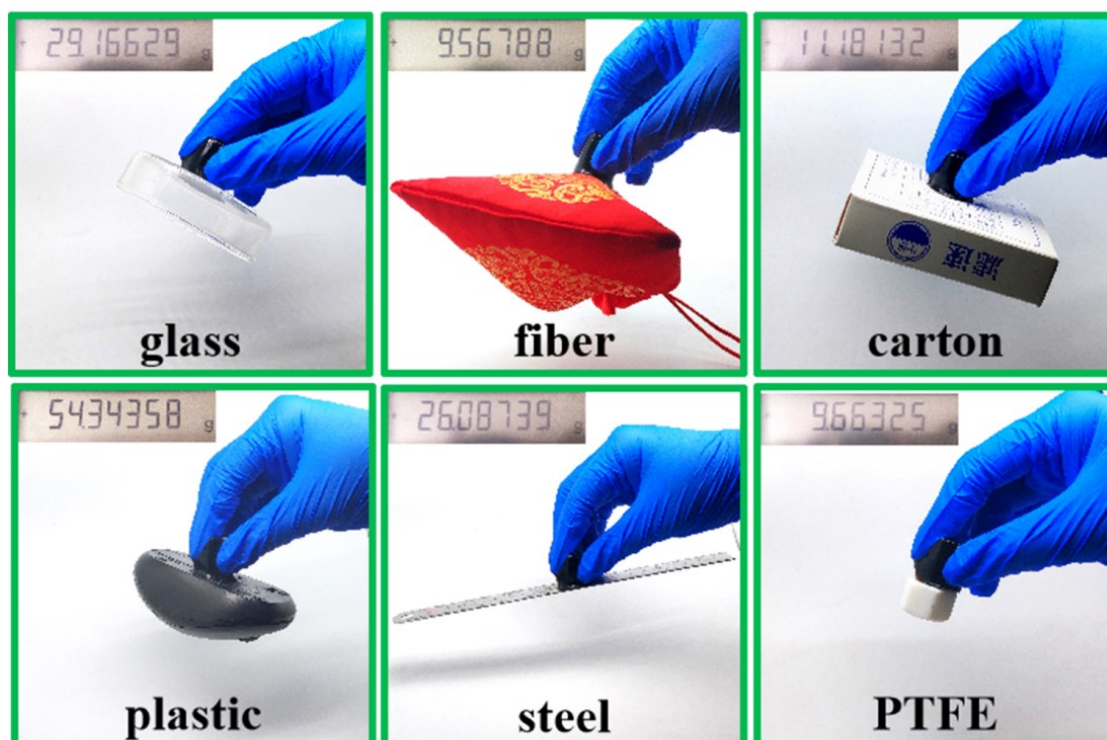

**Figure S5.** GPP-h can easily adhere to a variety of surfaces including glass, fiber, carton, plastic, steel, and PTFE.

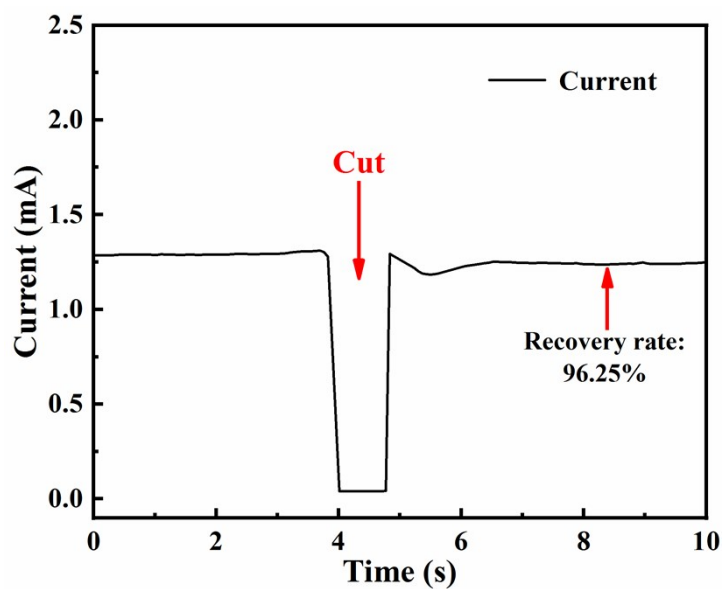

**Figure S6.** Time evolution of the healable process for the GPP-h determined by the real-time current measurement.

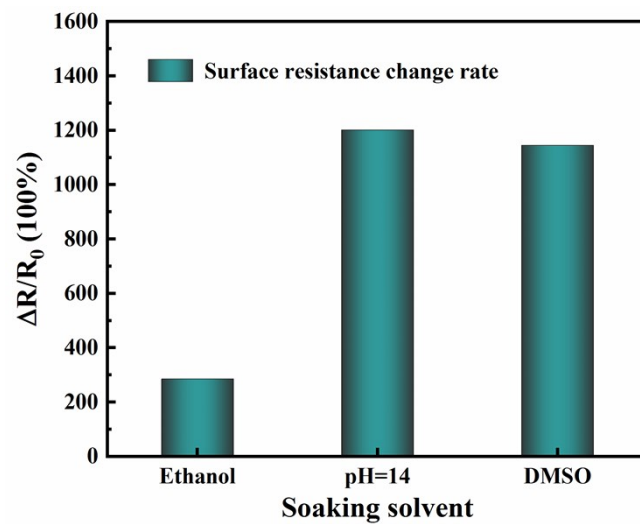

**Figure S7.** The resistance change rate of the hydrogel after being immersed in ethanol, alkali solution with pH of 14 and DMSO solution for 2 days.



**Table S2** Comparison of the conductive hydrogels-based artificial electronic skins

| Materials                   | Elongation at break (%) | Sensing Stability (cycles) | Sensing Ranges (%) | Conductivity (S m <sup>-1</sup> ) | Adhesion | Ref.      |
|-----------------------------|-------------------------|----------------------------|--------------------|-----------------------------------|----------|-----------|
| <b>GO/PEDOT:PSS/PNIPAM</b>  | 2512                    | 4000 (30%-S)               | ≥ 200              | 0.084                             | YES      | This work |
| PNIPAAm/PANI                | 290                     | 350 ( N/G)                 | ≤ 120              | 0.068                             | YES      | [1]       |
| TA@CNC                      | 800                     | ≈250 (20%-S)               | ≤ 100              | N/G                               | YES      | [2]       |
| MXene/PVA/PAAm              | ≈1600                   | N/G                        | 200-350            | N/G                               | NO       | [3]       |
| Poly(NIPAM-co-β-CD)/CNT/PPY | 515                     | N/G                        | N/G                | 34.93                             | NO       | [4]       |
| MXene/HAPAM/PNIPAM          | 1400                    | N/G                        | N/G                | 1.092                             | NO       | [5]       |
| CNT/Laponite/PNIPAM         | 1062                    | N/G                        | N/G                | 0.200                             | YES      | [6]       |
| GO/PNIPAM                   | 2800                    | N/G                        | N/G                | NO                                | NO       | [7]       |
| PAAm/PEDOT:PSS              | 525                     | 1000 ( 50%-S)              | 50                 | 1.000                             | NO       | [8]       |
| GO/PDA/PAM                  | 3500%                   | N/G                        | N/G                | 0.001                             | YES      | [9]       |
| PVA/PSBMA                   | 400%                    | N/G                        | 300                | 0.01                              | YES      | [10]      |
| PANI/P(AAm-co-HEMA)         | 530%                    | N/G                        | N/G                | 8.14                              | NO       | [11]      |

Note: 'S' indicates 'strain' in the Table. 'N/G' indicates 'not given' in the references.

## Reference

- [1] Z. Wang, H. Zhou, W. Chen, Q. Li, B. Yan, X. Jin, A. Ma, H. Liu, W. Zhao, *ACS Appl. Mater. Interfaces*, 2018, **10**, 14045.
- [2] C. Cui, C. Shao, L. Meng, J. Yang, *ACS Appl. Mater. Interfaces*, 2019, **11**, 39228.
- [3] H. Liao, X. Guo, P. Wan, G. Yu, *Adv. Funct. Mater.*, 2019, **29**, 1904507.
- [4] Z. Deng, Y. Guo, X. Zhao, P.X. Ma, B. Guo, *Chem. Mater.*, 2018, **30**, 1729.
- [5] Y. Zhang, K. Chen, Y. Li, J. Lan, B. Yan, L. Shi, R. Ran, *ACS Appl. Mater. Interfaces*, 2019, **11**, 47350.
- [6] Z. Deng, T. Hu, Q. Lei, J. He, P.X. Ma, B. Guo, *ACS Appl. Mater. Interfaces*, 2019, **11**, 6796.
- [7] K. Shi, Z. Liu, Y.Y. Wei, W. Wang, X.J. Ju, R. Xie, L.Y. Chu, *ACS Appl. Mater. Interfaces*, 2015, **7**, 27289.
- [8] Y.Y. Lee, H.Y. Kang, S.H. Gwon, G.M. Choi, S.M. Lim, J.Y. Sun, Y.C. Joo, *Adv. Mater.*, 2016, **28**, 1636.
- [9] L. Han, X. Lu, M. Wang, D. Gan, W. Deng, K. Wang, L. Fang, K.Liu, C. W. Chan, Y. Tang, L.T. Weng, and H. Yuan, *Small*, 2017, **13**, 1601916.

[10] Z. Wang, J. Chen, L. Wang, G. Gao, Y. Zhou, R. Wang, T. Xu, J. Yin, J. Fu, *J. Mater. Chem. B*, 2019, **7**, 24-29.

[11] Z. Wang, J. Chen, Y. Cong, H. Zhang, T. Xu, L. Nie, Jun Fu, *Chem. Mater.* 2018, **30**, 8062–8069.
